# Supplementary material for: Challenges associated with diagnostic exome sequencing in liver diseases
Source: bioRxiv or medRxiv preprint supplement (doi:10.1101/2022.06.21.22276400), 2023-02-09

Supplementary figure 2. A stringent filtering and ACMG-AMP classification revealed an enrichment of pathogenic/likely pathogenic variants in CLD cohort

A.

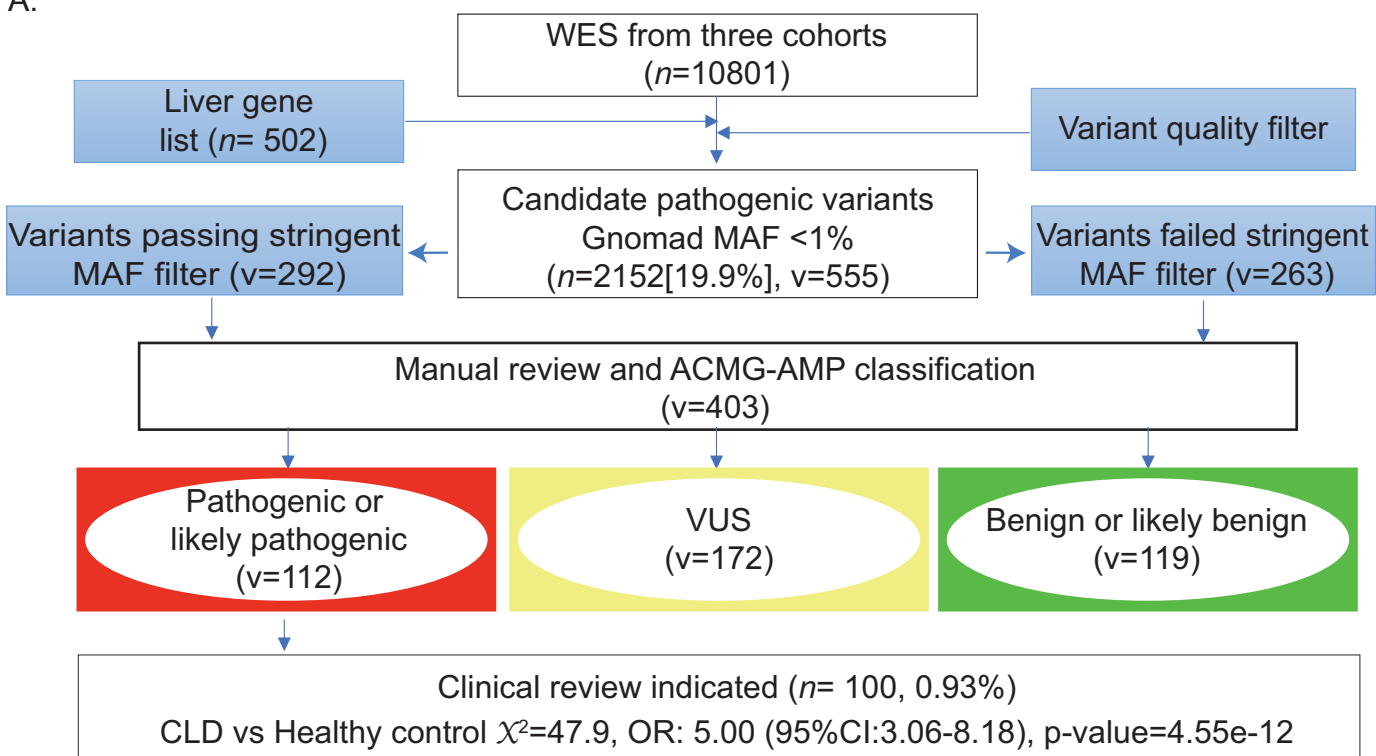

B.

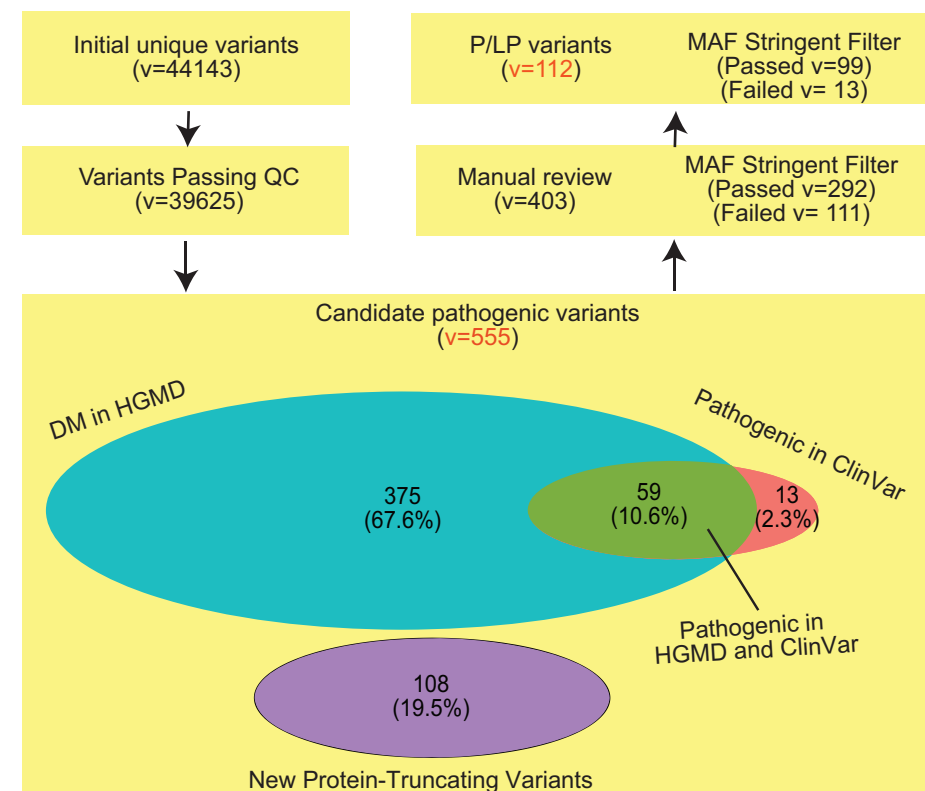

C.

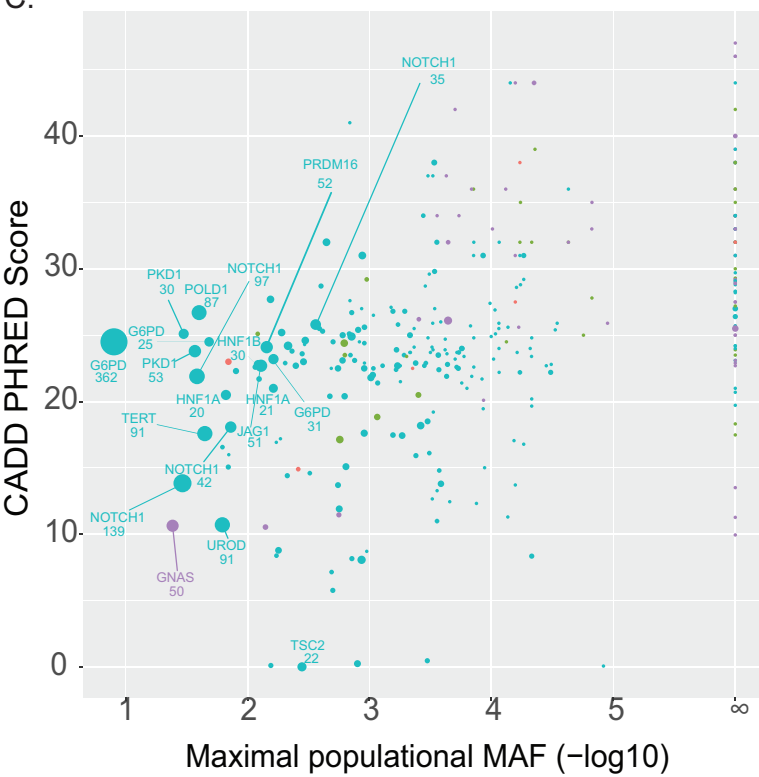

D.

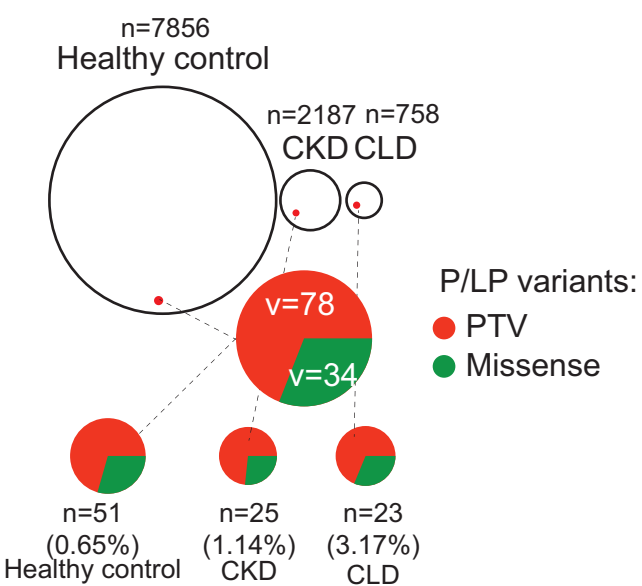

E.

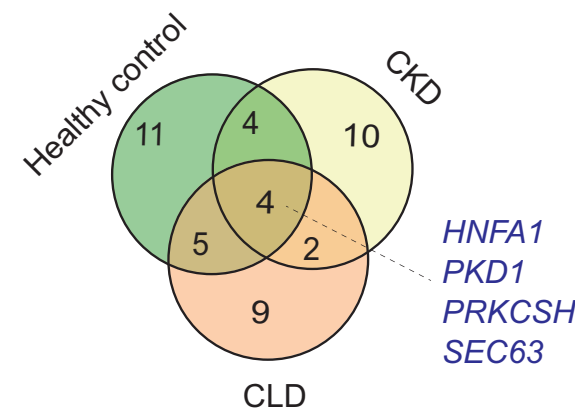

Supplement: Supplementary file [file media-4.pdf]
