# Supplementary material for: Challenges associated with diagnostic exome sequencing in liver diseases
Source: bioRxiv or medRxiv preprint supplement (doi:10.1101/2022.06.21.22276400), 2023-02-09
Supplement: Supplementary file [file media-5.pdf]

Supplementary Table 1: The original research of the samples used in this study

| Original research                                                             | Current study population                                                                                                                                                                                                                    | n=10, 801 |       |
|-------------------------------------------------------------------------------|---------------------------------------------------------------------------------------------------------------------------------------------------------------------------------------------------------------------------------------------|-----------|-------|
| WHICAP                                                                        | Population-based study of Medicare recipients aged $\geq 65$ years in northern Manhattan                                                                                                                                                    | 2983      | 27.6% |
| Genetics of neurological disorders, OCD, ALS, Epilepsy, memory, schizophrenia | Self-reported healthy family members of patients with epilepsy, ataxia, neuromuscular disorders, brain malformations, neurodevelopmental disorders, OCD, schizophrenia, ALS, early-onset Parkinson disease, and other neurological disorder | 2893      | 26.8% |
| Diagnostic sequencing study of undiagnosed genetic disorders                  | Self-reported healthy family members of patients with undiagnosed disorders from general genetic clinic                                                                                                                                     | 1564      | 14.5% |
| 27 additional studies                                                         | Self-reported healthy family members or control participants to a variety of genetic studies                                                                                                                                                | 325       | 3.0%  |
| <b>Genetic study of chronic liver diseases</b>                                | Self-reported healthy family members to chronic liver disease genetic study                                                                                                                                                                 | 94        | 0.9%  |
| Genetics study of kidney and Genitourinary disorders                          | Patients with chronic kidney diseases or genitourinary disorders                                                                                                                                                                            | 2187      | 20.2% |
| <b>Genetic study of chronic liver diseases</b>                                | Patients with chronic liver diseases                                                                                                                                                                                                        | 758       | 7%    |

WHICAP: Washington Heights-Inwood Columbia Aging project; ALS: amyotrophic lateral sclerosis; OCD: obsessive compulsive disorder.
