# Supplementary material for: Challenges associated with diagnostic exome sequencing in liver diseases
Source: bioRxiv or medRxiv preprint supplement (doi:10.1101/2022.06.21.22276400), 2023-02-09
Supplement: Supplementary file [file media-6.pdf]

Supplementary Table 2: Clinical characteristics and genetic testing information for three cohorts

| Characteristics                     | Healthy control cohort (n=7856) | Proportion in healthy control cohort | Chronic kidney disease cohort (n=2187) | Proportion in CKD cohort | Chronic liver disease cohort (n=758) | Proportion in CLD cohort |
|-------------------------------------|---------------------------------|--------------------------------------|----------------------------------------|--------------------------|--------------------------------------|--------------------------|
| <b>Gender</b>                       |                                 |                                      |                                        |                          |                                      |                          |
| Male                                | 3176                            | 40.4%                                | 945                                    | 43.2%                    | 351                                  | 46.3%                    |
| Female                              | 4680                            | 59.5%                                | 1242                                   | 56.8%                    | 407                                  | 53.7%                    |
| <b>Age at time of study entry</b>   |                                 |                                      |                                        |                          |                                      |                          |
| 0-21 yr                             | 240                             | 3.1%                                 | 278                                    | 12.7%                    | 255                                  | 33.6%                    |
| 22-44 yr                            | 1416                            | 18.0%                                | 713                                    | 32.6%                    | 150                                  | 19.8%                    |
| 45-64 yr                            | 597                             | 7.6%                                 | 800                                    | 36.6%                    | 226                                  | 29.8%                    |
| ≥ 65 yr                             | 103                             | 1.3%                                 | 396                                    | 18.1%                    | 127                                  | 16.8%                    |
| Unspecified                         | 5500                            | 70.0%                                |                                        |                          |                                      |                          |
| <b>Self-declared race/ethnicity</b> |                                 |                                      |                                        |                          |                                      |                          |
| White                               | 3427                            | 43.6%                                | 1113                                   | 50.9%                    | 367                                  | 48.4%                    |
| Hispanic                            | 2303                            | 29.3%                                | 435                                    | 19.9%                    | 136                                  | 17.9%                    |
| Black                               | 1070                            | 13.6%                                | 330                                    | 15.1%                    | 95                                   | 12.5%                    |
| Asia                                | 420                             | 5.3%                                 | 224                                    | 10.2%                    | 61                                   | 8%                       |
| Other or unspecified                | 636                             | 8.1%                                 | 85                                     | 3.9%                     | 99                                   | 13.1%                    |
| <b>Sequencing Modality</b>          |                                 |                                      |                                        |                          |                                      |                          |
| Whole Exome Sequencing              | 7735                            | 98.4%                                | 2187                                   | 100%                     | 758                                  | 100%                     |
| Whole Genome Sequencing             | 121                             | 1.6%                                 |                                        |                          |                                      |                          |
| <b>Exome Capture Kit</b>            |                                 |                                      |                                        |                          |                                      |                          |
| Roche                               | 5954                            | 76.7%                                | 1495                                   | 68.4%                    | 221                                  | 29.2%                    |
| IDTERPv1                            | 1147                            | 14.8%                                | 692                                    | 31.5%                    | 537                                  | 70.8%                    |
| Other                               | 664                             | 8.6%                                 |                                        |                          |                                      |                          |
