# Supplementary material for: Challenges associated with diagnostic exome sequencing in liver diseases
Source: bioRxiv or medRxiv preprint supplement (doi:10.1101/2022.06.21.22276400), 2023-02-09
Supplement: Supplementary file [file media-7.pdf]

Supplementary Table 3: The inheritance mode and biological annotations of 502 genes related to Mendelian disorders and liver phenotypes

| 502 liver genes | Hepatocyte<br>Intrinsic | Biliary | Metabolism | Immune | Development |
|-----------------|-------------------------|---------|------------|--------|-------------|
| AD (n=61)       | 26                      | 9       | 12         | 9      | 31          |
| AD& AR (n=62)   | 26                      | 12      | 26         | 16     | 33          |
| AR (n=363)      | 161                     | 53      | 180        | 60     | 224         |
| XLD (n=1)       | 0                       | 0       | 1          | 0      | 0           |
| XLR(n=15)       | 6                       | 2       | 3          | 5      | 10          |

AD: Autosomal dominant, AR: Autosomal recessive, XLD: X-linked dominant, XLR: X-linked recessive.
