# Supplementary material for: Challenges associated with diagnostic exome sequencing in liver diseases
Source: bioRxiv or medRxiv preprint supplement (doi:10.1101/2022.06.21.22276400), 2023-02-09
Supplement: Supplementary file [file media-8.pdf]

Supplementary Table 4: Stepwise filtering to identify individuals with likely pathogenic variants in liver genes

| <b>Total WES<br/>(n=10,804)</b>                    | <b>Healthy control cohort<br/>(n=7856)</b> | <b>Kidney disease cohort<br/>(n=2187)</b> | <b>Liver disease cohort<br/>(n=758)</b> |
|----------------------------------------------------|--------------------------------------------|-------------------------------------------|-----------------------------------------|
| Initial total variants count                       | 215,147                                    | 57,724                                    | 19,916                                  |
| Variants: QC filter                                | 186,818                                    | 50,443                                    | 17,884                                  |
| Unique variants                                    | 31,669                                     | 14,319                                    | 7,202                                   |
| Pathogenic<br>HGMD or ClinVar                      | 1873                                       | 519                                       | 208                                     |
| New Protein Truncating<br>Variants                 | 145                                        | 38                                        | 16                                      |
| Individuals carry candidate<br>pathogenic variants | 1577 (20.1%)                               | 416 (19.0%)                               | 159(21.0%)                              |
